# Supplementary material for: An insight into the salivary gland content of the human body louse, Pediculus humanus
Source: Springer Nature journal article supplement (doi:10.1038/s41598-025-01412-5), 2025-05-26
Supplement: MOESM1 [file 41598_2025_1412_MOESM1_ESM.pdf]

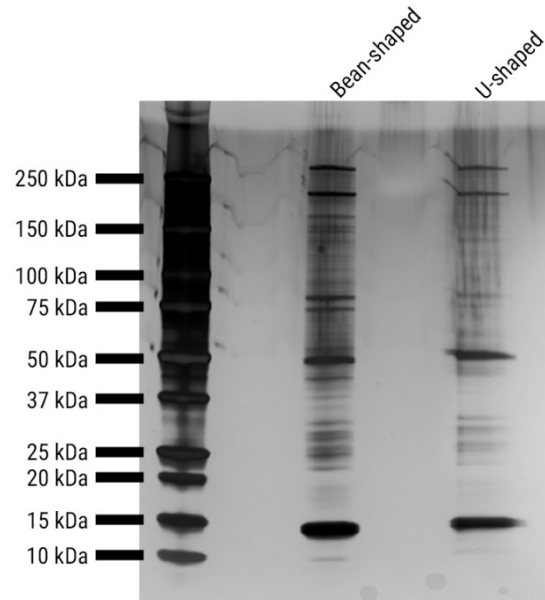

**Supplementary Figure 1:** Silver-stained SDS-PAGE (10%) gel containing protein extracts from Bean-shaped (5  $\mu$ g) and U-shaped (3  $\mu$ g) salivary glands. The Protein Precision Plus Standard (Bio-Rad) was used as the molecular weight marker.

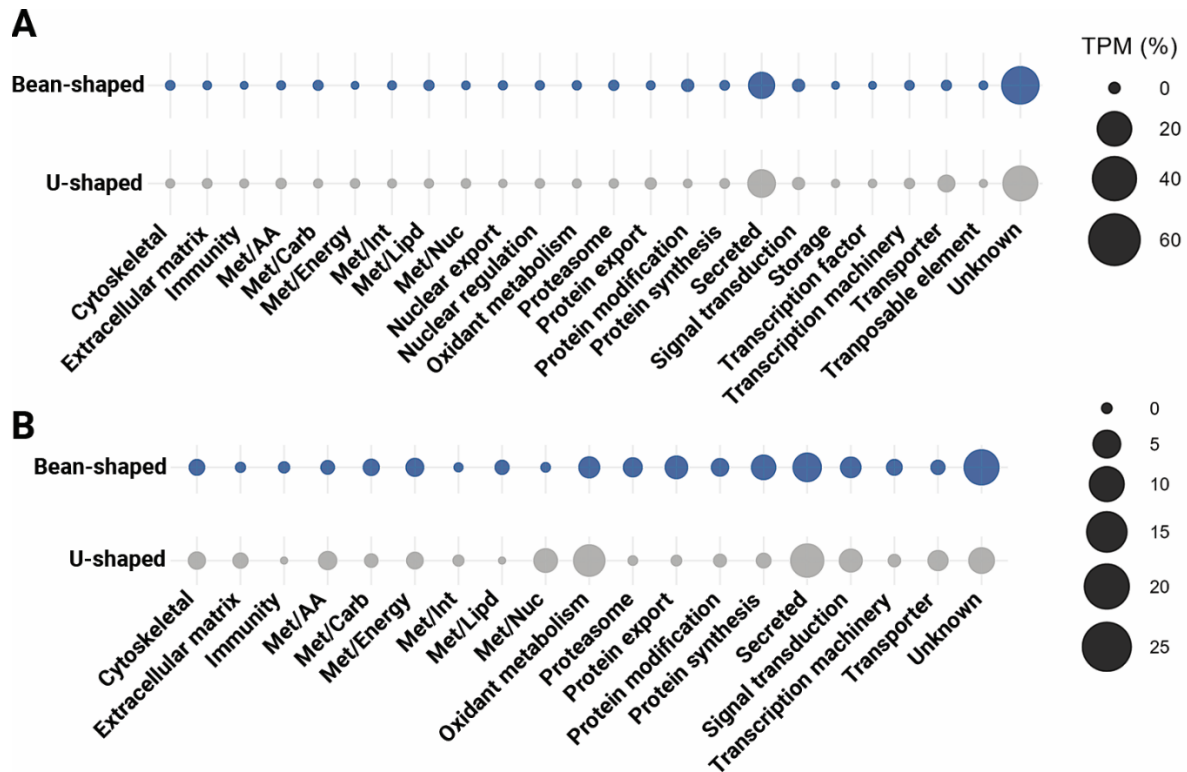

**Supplementary Figure 2:** Bubble plot representing the functional classification of the unique transcripts and proteins identified in the Bean- and U-shaped salivary glands of *P. humanus*. The size of the spheres represents the average **(A)** TPM of the CDS of each class or the **(B)** NSAF of the proteins identified by LC-MS/MS as percentages.

**A**

|                |                    |                   |                |                 |
|----------------|--------------------|-------------------|----------------|-----------------|
|                | 10                 | 20                | 30             | 40              |
| seqSigP-12505  | MADFRIILLIIVLALFSL | ECQS              | AQVPKSATNLDLRL | FVENS           |
| XP_002432909.1 | MADFRIILLIIVLALFSL | ECQS              | AQVPKSATNLDLRL | FVENS           |
|                | 50                 | 60                | 70             | 80              |
| seqSigP-12505  | ETVAKTLLSSLNDALDK  | VKPNVDVMVEELS     | PEAKTLVKEA     |                 |
| XP_002432909.1 | ETVAKTLLSSLNDALDK  | VKPNVDVMVEELS     | PEAKTLVKEA     |                 |
|                | 90                 | 100               | 110            | 120             |
| seqSigP-12505  | VKEGREKLAKEQERVN   | VFDTLNKAMKDLEPTKS | ADKFS          |                 |
| XP_002432909.1 | VKEGREKLAKEQERVN   | VFDTLNKAMKDLEPTKS | ADKFS          |                 |
|                | 130                | 140               | 150            | 160             |
| seqSigP-12505  | GPGKKWAHET         | EKKFVE            | VEYKVMKKHGK    | VLENLKVGGKVL    |
| XP_002432909.1 | GPGKKWAHET         | EKKFVE            | VEYKVMKKHGK    | VLENLKVGGKVL    |
|                | 170                | 180               | 190            | 200             |
| seqSigP-12505  | KNARQLFDEKVPKFVA   | WT                | PGKKDSKE       | VNKEVQSTLQEG    |
| XP_002432909.1 | KNARQLFDEKVPKFVA   | WT                | PGKKDSKE       | VNKEVQSTLQEG    |
|                | 210                | 220               | 230            | 240             |
| seqSigP-12505  | LKLVSDLTTL         | MTADADLPV         | MEDM           | VGKLAPVALGAMTGM |
| XP_002432909.1 | LKLVSDLTTL         | MTADADLPV         | MEDM           | VGKLAPVALGAMTGM |
|                | 250                |                   |                |                 |
| seqSigP-12505  | TDLMNKFS           | DC                | VANLK          |                 |
| XP_002432909.1 | TDLMNKFS           | DC                | VANLK          |                 |

**B**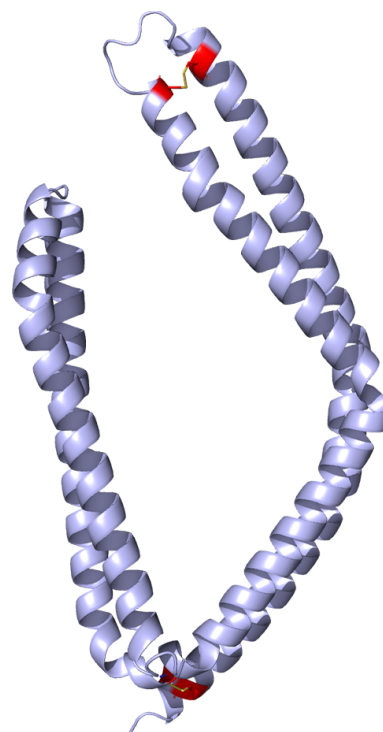

**Supplementary Figure 3:** Amino acid alignment of seqSigP-12505 and the *P. humanus* genomic entry XP\_002432909.1. **(A)** The putative signal peptide is highlighted in red, while the cysteine residues forming the two disulfide bridges are marked in orange. Non-conserved residues between both sequences are depicted in blue. **(B)** Predicted structure of the mature seqSigP-12505 protein generated using AlphaFold2. Cysteine residues involved in disulfide bridge formation are highlighted in red. The figure was rendered and edited using PyMOL.

**Supplementary File 1:** Excel spreadsheet containing summary results and associated files of the transcriptome analysis.

**Supplementary File 2:** Excel spreadsheet containing summary results from the LC-MS analysis.
